# Oxamniquine Derivatives Overcome Praziquantel Treatment Limitations for Schistosomiasis

Sevan N. Alwan<sup>1\*</sup>, Alexander B. Taylor<sup>2</sup>, Jayce Rhodes<sup>3</sup>, Michael Tidwell<sup>3</sup>, Stanton F.  
McHardy<sup>3</sup>, Philip T. LoVerde<sup>1</sup>

<sup>1</sup>Departments of Biochemistry and Structural Biology, University of Texas Health at San  
Antonio; San Antonio, Texas 78229, USA.

<sup>2</sup>Biology Core Facilities, University of Texas Health at San Antonio; San Antonio, Texas 78229,  
USA.

<sup>3</sup>Center for Innovative Drug Discovery, Department of Chemistry, University of Texas at San  
Antonio; San Antonio, Texas 78249, USA.

\*Corresponding author:

Email: [alwan@uthscsa.edu](mailto:alwan@uthscsa.edu), [sevan.alwan13@uthscsa.edu](mailto:sevan.alwan13@uthscsa.edu)

Key words: *Schistosoma*, drug discovery, crystallography, drug resistance, RNA interference  
(RNAi)

## 23 Abstract

24 Human schistosomiasis is a neglected tropical disease caused by *Schistosoma mansoni*, *S.*  
25 *haematobium*, and *S. japonicum*. Praziquantel (PZQ) is the method of choice for treatment. Due  
26 to constant selection pressure, there is an urgent need for new therapies for schistosomiasis.  
27 Previous treatment of *S. mansoni* included the use of oxamniquine (OXA), a drug that is  
28 activated by a schistosome sulfotransferase (SULT). Guided by data from X-ray crystallography  
29 and *Schistosoma* killing assays more than 350 OXA derivatives were designed, synthesized, and  
30 tested. We were able to identify CIDD-0150**610** and CIDD-0150**303** as potent derivatives *in*  
31 *vitro* that kill (100%) of all three *Schistosoma* species at a final concentration of 71.5  $\mu$ M. We  
32 evaluated the efficacy of the best OXA derivatives in an *in vivo* model after treatment with a single  
33 dose of 100 mg/kg by oral gavage. The highest rate of worm burden reduction was achieved by  
34 CIDD -150**303** (81.8%) against *S. mansoni*, CIDD-0149**830** (80.2%) against *S. haematobium* and  
35 CIDD-066**790** (86.7%) against *S. japonicum*. We have also evaluated the ability of the  
36 derivatives to kill immature stages since PZQ does not kill immature schistosomes. CIDD-  
37 0150**303** demonstrated (100%) killing for all life stages at a final concentration of 143  $\mu$ M *in*  
38 *vitro* and effective reduction in worm burden *in vivo* against *S. mansoni*. To understand how  
39 OXA derivatives fit in the SULT binding pocket, X-ray crystal structures of CIDD-0150**303** and  
40 CIDD-0150**610** demonstrate that the SULT active site will accommodate further modifications  
41 to our most active compounds as we fine tune them to increase favorable pharmacokinetic  
42 properties. Treatment with a single dose of 100 mg/kg by oral gavage with co-dose of PZQ +  
43 CIDD-0150303 reduced the worm burden of PZQ resistant parasites in an animal model by  
44 90.8%. Therefore, we conclude that CIDD-0150**303**, CIDD-0149**830** and CIDD-066**790** are

45 novel drugs that overcome some of PZQ limitations, and CIDD-0150303 can be used with PZQ  
46 in combination therapy.

## 47 **Author Summary**

48 Human schistosomiasis is a neglected tropical disease caused by parasitic worms in the genus  
49 *Schistosoma*. Human schistosomiasis is caused mainly by three major species: *S. mansoni*, *S.*  
50 *haematobium*, and *S. japonicum*. It affects some 229 million people in 78 countries. Currently,  
51 there is no effective vaccine against human schistosomiasis. Praziquantel is the method of choice  
52 for treatment and evidence for drug resistance has been reported. Our focus is drug discovery for  
53 schistosomiasis. Our project team is designing, synthesizing, and testing reengineered derivatives  
54 of oxamniquine against the three human species of *Schistosoma*. The aim is to develop a new  
55 drug for schistosomiasis to overcome developing resistance and improve efficacy. We developed  
56 and identified compounds that kill all three human *Schistosoma* species in addition to a PZQ-  
57 resistant strain in animal models. Additionally, animal studies demonstrate that combination  
58 treatment of reengineered oxamniquine drugs and praziquantel effectively reduced the infection  
59 with a praziquantel resistant strain in infected mice.

## 60 **Introduction**

61 Human schistosomiasis is a neglected tropical disease caused by parasitic flatworms in the genus  
62 *Schistosoma*. Human schistosomiasis is caused mainly by three major species: *S. mansoni*, *S.*  
63 *haematobium*, and *S. japonicum*. It affects some 229 million people globally [1-3]. Of those  
64 infected 20,000-200,000 people are estimated to die from the disease annually [4-6].  
65 However, the major impact of schistosomiasis is life years lost due to morbidity. The DALYs  
66 index (“Disability-Adjusted Life Years”) for schistosomiasis is estimated at 1.9 million [7].

67 *Schistosoma* has a complex life cycle that involves freshwater snails as intermediate hosts and  
68 humans among others as a final host. Three stages of *Schistosoma* life cycle live in an infected  
69 human host; eggs, juvenile worms, and adult worms. The infection leads to periportal fibrosis,  
70 portal hypertension, liver and spleen enlargement and the serious sequelae of esophageal and  
71 upper gastrointestinal varices, recurrent hematemesis, abdominal ascites and urogenital  
72 involvement such as , bladder deformity, hydronephrosis, hematuria, female genital  
73 schistosomiasis, infertility, increased risk of HIV-1 transmission, and squamous cell carcinoma  
74 of the bladder [8-11]. There are also systemic morbidities associated with *Schistosoma* infection  
75 such as anemia, growth stunting, impaired cognition, undernutrition, diarrhea, and decreased  
76 physical fitness [11]. Currently, there is no effective vaccine against human schistosomiasis.  
77 Only one treatment, praziquantel (PZQ) is available. Although PZQ is effective against all three  
78 species, the reported cure rates are 60-90% [12], PZQ is not effective against juvenile worms, it  
79 does not prevent reinfection, and evidence for drug resistance has been reported [13-17].  
80 Oxamniquine (OXA) is a drug that was used previously to treat millions of people with *S.*  
81 *mansoni* with cure rates similar to PZQ [18, 19]. OXA is effective against adult stage  
82 schistosomes, and evidence of drug resistance against OXA in the laboratory and in the field has  
83 been demonstrated [20, 21]. A study by Cioli et al. demonstrated that OXA resistance is a  
84 double recessive trait. With this information Valentim et al. identified the gene responsible for  
85 OXA resistance [22, 23]. OXA is activated by *S. mansoni* sulfotransferase (*SmSULT*) via  
86 transiently adding a sulfate to a hydroxy-methyl group. The activated form of OXA undergoes  
87 nucleophilic attack by macromolecules such as DNA, resulting in killing of *S. mansoni* [22, 24].  
88 Alternatively, the sulfur group will decay and activated OXA acts as an electrophile forming  
89 adducts with macromolecules and interfering with schistosome metabolism [25]. Although

90 sulfotransferase orthologs are expressed by *S. haematobium* and *S. japonicum*, OXA is not  
91 effective against these two species [24]. However, differences in sulfotransferase enzyme  
92 efficiency, variation in detoxification processes between species, and differences in  
93 sulfotransferase concentration remain possible explanations for species-specific resistance and  
94 may be interdependent in establishing OXA toxicity. Therefore, one answer to the question is  
95 that OXA kills *S. mansoni* but not *S. haematobium* or *S. japonicum* because it does not fit into  
96 the SULT binding pocket productively and does not get activated to a sufficiently toxic level  
97 [26].

98 Due to the danger of resistance to the monotherapy praziquantel, developing a novel drug will  
99 have a significant impact on global human health and will lead to improved treatments for  
100 *Schistosoma* to reduce the morbidity, mortality, and transmission rates associated with these  
101 devastating infections. An iterative process for drug development has been used to identify  
102 derivatives of OXA that demonstrate effective killing against all three human species of the  
103 parasite [25, 27, 28]. From these, we were able to identify CIDD-0066790 and its (*R*-  
104 enantiomer CIDD-0072229, both of which demonstrated broad species killing activity: *S.*  
105 *mansoni* (75%), *S. haematobium* (40%) and *S. japonicum* (83%) and *S. mansoni* (93%), *S.*  
106 *haematobium* 95% and *S. japonicum* 80%, respectively in an *in vitro* killing assay [27, 28].  
107 Recently, we were able to identify the derivative CIDD-0149830 that kills 100% of the *S.*  
108 *mansoni*, *S. haematobium* and *S. japonicum* worms *in vitro* within one week compared to 14  
109 days for OXA to kill *S. mansoni* [28]. Our goal is to develop a novel therapeutic that will kill all  
110 three species of *Schistosoma* that has a mechanism of action different from PZQ to overcome the  
111 potential for resistance and enhance efficacy. In this paper, we present data identifying 2 OXA  
112 derivatives that kill all human species and work against liver stage schistosomes. Thus, have the

113 potential to improve chemotherapy.

## 114 **Results**

115 We previously identified CIDD-0149**830** (referred to as **830**) that shows 100% pan-specific  
116 killing activity *in vitro*. In this study we have identified an additional two derivatives that show  
117 100% pan-specific killing activity after treatment for 45 minutes at a final concentration of 143  
118  $\mu\text{M}$  *in vitro* (Fig 1), CIDD-0150**610** (referred to as **610**) and CIDD- 0150**303** (referred to as **303**)  
119 of which **303** is an enantiomer of **830** (S1 Table). **610** and **303** were able to kill 100% of *S.*  
120 *mansoni* at 143  $\mu\text{M}$  within 24 hours in an *in vitro* killing assay.

121 In order to determine the minimum dose for those derivatives that demonstrate the best killing  
122 (100%) of the three species within 14 days of incubation, we evaluated a dose response using  
123 143  $\mu\text{M}$ , 71.5  $\mu\text{M}$ , 35.75  $\mu\text{M}$  and 14.3  $\mu\text{M}$  to determine the best concentration for killing. Fig 2  
124 shows the ability of **303** and **610** to kill 100% of *S. mansoni*, *S. haematobium*, and *S. japonicum*  
125 worms at 71.5  $\mu\text{M}$  and about 50% at 35.75  $\mu\text{M}$  (S1 Fig). Fig 2 also shows a final concentration  
126 of 71.5  $\mu\text{M}$  of OXA was able to only kill 40% of *S. mansoni* within 14 days.

127

128 We have tested the ability of OXA and OXA derivatives: **830**, **610** and **303** to kill both  
129 schistosome genders. The drugs **610** and **303** kill 100% at a final concentration of 143  $\mu\text{M}$  of  
130 unpaired female and male worms each from bisex infection and female and male worms in worm  
131 pairs. Interestingly, **303** was able to kill them all within 24 hours at 143  $\mu\text{M}$ . Paired male worms  
132 were less susceptible to OXA (Fig 3).

133

134 To test the efficacy of OXA derivatives in an *in vivo* model, five mice per group were infected

135 with 80 *S. mansoni* cercariae, treated by oral gavage with 100 mg/kg of OXA, **830**, **610**, and **303**  
136 at day 45 post-exposure. Ten days after treatment with **830** and **303** the worm burden was  
137 reduced by 72.3%  $P=0.012$  and 81.8%  $P=0.0017$ , respectively. The reduction in worm burden  
138 after **610** treatment was 47%  $P=0.054$  and was not significant. However, OXA reduced the  
139 number of worms by 93%  $P=0.0002$  (Fig 4A). Five hamsters per group were infected with 100  
140 cercariae of *S. haematobium*, treated 90 days later with 100 mg/kg of **830**, **610**, and **303**.  
141 Treatment with all compounds showed significant killing. The reduction in the number of  
142 collected worms after **830** treatment was 80.2%  $P=0.0001$ . Furthermore, **610** and **303** showed  
143 significant killing for *S. haematobium* infection 69.1% and 60%, respectively (Fig 4B). To  
144 evaluate OXA derivatives against *S. japonicum* in infected hamsters, five animals per group were  
145 treated with 100 mg/kg of **830**, **610**, **303**, and CIDD-066790 (referred to as **790**) at day 30 post-  
146 exposure. CIDD-066790 is a derivative that was identified previously and demonstrated broad  
147 species killing activity. After *S. japonicum* worm collection, we obtained a reduction in worm  
148 burden of 38.3%  $P=0.00443$  with **830**, 61%  $P=0.0019$  with **610**, 31%  $P=0.121$  with **303**, and  
149 86.7%  $P=0.0003$  **790** compared to control animals (Fig 4C).

150 One of the PZQ treatment limitations is that PZQ does not kill immature schistosomes and  
151 therefore, we have also focused on derivatives that will kill immature, liver stage schistosomes  
152 [29, 30]. Therefore, we treated liver stages with 143  $\mu$ M of **830**, **610** and **303** in an *in vitro* assay.  
153 **303** treatments in an *in vitro* assay leads to 100% killing of liver stage 20-28 dpi worms in 2 days  
154 (Fig 5).

155 We tested the ability of **303** to kill juvenile worms in an *in vivo* study. Five mice per group were  
156 infected with 80 *S. mansoni* cercariae, treated with **303** at 100 mg/kg as a single oral dose on 20  
157 dpi, 25 dpi, 28 dpi and 32 dpi and perfused 45 dpi. **303** reduced the worm burden significantly on

158 25 dpi by 63.8%  $P= 0.0001$ , 28 dpi by 48.9%  $P= 0.000$ , and 32 dpi by 54.1%  $P= 0.0005$  (Fig 6).

159 At 20 dpi, worm burden reduction was not significant.

160 The molecular structures of *SmSULT* with **303** and **610** were determined using X-ray  
161 crystallography to characterize their modes of binding in the active site (Fig 7). *SmSULT* was  
162 pre-incubated with the CIDD compounds for 30 min prior to addition of PAP which resulted in  
163 crystal complexes of enzyme with bound compounds. The phenyl ring containing the nitro- and  
164 hydroxymethyl groups are observed in alternate positions when comparing the compounds to  
165 each other and this has been observed previously, likely due to the crystals containing the  
166 depleted co-substrate Adenosine 3',5' diphosphate (PAP) instead of the active co-substrate 3'-  
167 phosphoadenosine 5'-phosphosulfate (PAPS) which would turn over the substrates [27].  
168 Importantly, the structures revealed that while both **303** and **610** contain indole and  
169 (trifluoromethyl) phenyl moieties, these groups are interchangeable in position in the substrate  
170 binding pocket (Fig 7). These branched moieties occupy two distinct regions in the *SULT* active  
171 site that were observed with previous generations of compounds from our studies that contained  
172 single branches [27] which led us to design hybrid/branched generation of compounds.

173 To further demonstrate the mechanism of action is through sulfation by a sulfotransferase, we  
174 used RNA interference (RNAi) against the *Schistosoma* sulfotransferases (*SmSULT*) and tested  
175 the ability of these derivatives to kill *S. mansoni* parasites. The parasites where *SULT* was  
176 knocked down were resistant to drug treatment compared to controls, confirming that the mode  
177 of action is conserved [28] (S2 Fig).

178 PZQ resistance is the most compelling reason for the development of an additional treatment.

179 We have selected PZQ resistant parasites and currently have a PZQ-R isolate that is resistant.



180 IC<sub>50</sub> for the PZQ-R is 377-fold higher than for the sensitive parasite from which it was derived  
181 [31, 32]. We tested OXA derivatives against PZQ- R at a final concentration of 143 μM, **830**,  
182 **610**, and **303** were able to kill 100% PZQ-R *in vitro* (Fig 8).

183 To test combination treatment of PZQ and OXA derivatives and demonstrate that the derivatives  
184 would kill PZQ-R in an animal model, five mice per group were infected with *S. mansoni* PZQ-R  
185 then treated with PZQ, **610**, PZQ + **610**, **303** and PZQ + **303** at a 100 mg/kg of each by oral  
186 gavage. Our data shows that the OXA derivative **303** kills PZQ-R worms and that combination  
187 treatment of PZQ + **303** significantly reduced the worm burden by 90.8%  $P= 0.0001$  (Fig 9). The  
188 data also demonstrate that the PZQ-R strain was indeed resistant to PZQ as treatment with PZQ  
189 did not lead to significant reduction in worm burden.

190

191

## 192 **Discussion**

193 Our structure-based drug design approach produced a robust Structure Activity Relationship  
194 (SAR) program that identified several new lead compounds with effective worm killing [24, 25,  
195 27, 28]. The best derivatives were soaked into *SmSULT* to repeat this process. This has led to  
196 synthesis and testing of more than 350 derivatives of OXA. Of the 350 derivatives, three were  
197 identified that kill 100% of all three human schistosomes *in vitro*: **830** [28], **610** and **303** (Fig1).  
198 Moreover, the newly designed OXA compounds were more effective in killing *S. mansoni* than  
199 OXA. All the identified compounds kill 100% of *S. mansoni* most requiring less than 14 days,  
200 while OXA will kill 90% of *S. mansoni* in 14 days. We chose 143 μM for the *in vitro* screening

201 studies from the calculation of the molarity of 40 mgs/kg, a dose given to humans to be 143  $\mu$ M.  
202 The observation that patient OXA plasma levels are insufficient to kill *S. mansoni in vitro* led to  
203 the hypothesis that the OXA levels within the vasculature the worms reside in are more  
204 predictive than systemic levels. To support this hypothesis, we performed  
205 pharmacokinetic/pharmacodynamic (PK/PD) study for OXA and employing dosing conditions in  
206 mice that were modeled and experimentally verified to recapitulate drug exposure observed in  
207 human patients treated with OXA, Toth et al., demonstrated that the calculated portal  
208 concentration where the schistosomes reside was consistent with the concentrations used in  
209 the *in vitro* killing experiment [33]. In addition, the 45 min exposure time used for the *in vitro*  
210 experiment mimics the human situation where OXA levels rise immediately after dosing and  
211 decline as additional drug is not absorbed from the intestine and systemic OXA is metabolized  
212 and excreted [33]. We are working to enhance solubility and bioavailability as we posit that rapid  
213 absorption is important for high portal concentration. We previously demonstrated that the  
214 difference in sulfotransferases molecular structures among the three *Schistosoma* species does  
215 not abrogate OXA binding in the active site. Furthermore, we showed that all three schistosomal  
216 enzymes are able to bind to and sulfate OXA to varying degrees *in vitro* [24, 30]. This is linked  
217 to the ability of OXA to fit in the binding pocket and to the catalytic efficiency of sulfur transfer  
218 [24, 26]. The evolution and progress of OXA derivative design allow for new binding modes for  
219 derivatives capable of being active against all three *Schistosoma* species. The efficient and  
220 productive binding led to a reduction in the amount of drug required to achieve successful killing  
221 (Fig 2). These data show using a dose of 71.5  $\mu$ M of **610** and **303** was sufficient to kill 100% of  
222 *S. mansoni*, *S. haematobium*, and *S. japonicum*. **830** was less effective against *S. haematobium*  
223 and *S. japonicum* at 71.5  $\mu$ M compared to OXA which kills 40% of *S. mansoni* at this

224 concentration. Male worms are 5X more sensitive to OXA than are adult female worms which  
225 correlates with the higher levels of *SmSULT* expression in male adult worms compared to female  
226 adult worms [26, 28, 32] However, **303** demonstrates very effective killing for both genders in a  
227 very short period as it was able to kill 100% of single mature female and male worms and paired  
228 female and male worms all within 24 hours (Fig 3). However, single mature females were less  
229 sensitive to **830** and OXA.

230 We performed an *in vivo* study to evaluate the efficacy of **830**, **610**, **303** in all 3 human  
231 schistosome species and **790** in *S. japonicum* (Fig 4). The highest reduction rate among OXA  
232 derivatives in *S. mansoni* infection treatment was achieved by **303**. **303** reduced the number of  
233 harvested worms by 81.8% ( $P=0.017$ ) compared to the negative control (Fig 4A). All three drugs  
234 showed a significant reduction in the number of *S. haematobium* harvested worms. **830** showed a  
235 very significant reduction rate 80.2% ( $P=0.001$ ) compared to the negative control. Furthermore,  
236 **610** and **303** showed significant killing for *S. haematobium* infection at 69.1% and 60%,  
237 respectively (Fig 4B). An effective killing for *S. japonicum* was obtained by **790** and **610** where  
238 the reduction rates were 86.7% ( $P=0.0003$ ) and 61% ( $P=0.0019$ ) respectively (Fig 4C). These  
239 results are very encouraging as re-engineered OXA is effective against *S. haematobium* and *S.*  
240 *japonicum*. Improving the formulation to enhance aqueous solubility, extend release and prolong  
241 uptake will enhance OXA-derivative treatment. Since *S. mansoni* and *S. haematobium* do not  
242 occur in China and the Philippines where *S. japonicum* is present, our data suggest that **790** would  
243 be the best partner for PZQ to treat *S. japonicum* [33]

244 Schistosomiasis treatment has a limitation regarding immature worms as PZQ does not kill  
245 immature schistosomes allowing the infection to reestablish itself rather quickly [29]. Moreover,  
246 previous studies demonstrated a stage-specific susceptibility of *S. mansoni* to OXA treatment

247 [34, 35]. This might be associated with the level of *SmSULT* transcript. The expression of  
248 *SmSULT* in male worms increases in 21 dpi, 28 dpi reaching the highest levels at day 35 dpi [36-  
249 38]. Similar to male worms, female worms' *SmSULT* transcript increases in 21 dpi, peaks at day  
250 28 dpi, but then begins to decrease [36, 37]. Therefore, developing a drug that will kill the liver  
251 stage schistosomes adds additional value to *Schistosoma* treatment. The effective OXA  
252 derivatives; **830** [28], **610** and **303** (Fig 1) demonstrate 100% killing of the liver stage 20-28 dpi  
253 worms *in vitro* in 2-6 days. Again, **303** was highly efficacious by killing 100% of liver stages in  
254 1-2 days, *in vitro* (Fig 5). These results were encouraging for evaluating **303** performance in  
255 animals (Fig 6). The result, a reduction of worm burden by 49-64%, is an advance over PZQ as  
256 PZQ's lack of efficacy against juvenile schistosomes results in rapid re-infection in highly  
257 endemic areas [39]. However, the 20 dpi result was not significant. One possible answer is that  
258 immature schistosomes leave the circulation of the lungs and move to the portal circulation of  
259 the liver by crossing the splenic bed at around day 18 post infection. Development in  
260 schistosomes is asynchronous so some 20 day old worms may not be developed enough to  
261 produce sufficient *SmSULT* to be killed. The X-ray crystal structures of **303** and **610** further  
262 demonstrate that the *SULT* active site can accommodate further modifications in the derivatives.  
263 For example, we synthesized two compounds, **303** and **610** with branched indole and  
264 (trifluoromethyl)phenyl moieties that swap positions between their binding modes (Fig 7).  
265 Obtaining these crystals required pre-incubating apo *SmSULT* with CIDD compounds prior to  
266 adding PAP, which suggests that PAP stabilizes the enzyme structure thereby limiting access to  
267 the active site for our larger, branched compounds. However, upon binding, the compounds do  
268 not appear to alter the protein structure significantly in the active site or overall. The root-mean-  
269 square deviation for the **303** complex compared to OXA-bound *SmSULT* [40] is 0.50 Å over

270 1665 atoms and for the **610** complex, 0.16 Å over 1704 atoms calculated using PyMOL. Thus,  
271 we anticipate the SULT active site will accommodate further modifications to our most active  
272 compounds as we fine tune them to increase favorable pharmacokinetic properties. Our studies  
273 demonstrated that OXA derivative **790** has the same mode of action as OXA [38]. Knockdown  
274 of *SmSULT* using RNA-interference (S2 Fig) results in resistance to **830**, **610** and **303**  
275 treatments, confirming that the mode of action is conserved. This experiment was a confirmation  
276 of our previous work [22] that demonstrates the mode of action of OXA and OXA derivatives is  
277 the same, due to limited number of worms (n=30), we performed qPCR only once therefore we  
278 didn't show the figures. In contrast to OXA, the PZQ mode of action was not completely  
279 understood [41], until recently [31, 32]. It is now known that PZQ activates a flatworm transient  
280 receptor potential channel (TRPMPZQ) to mediate sustained Ca<sup>2+</sup> influx and worm paralysis  
281 [32]. Thus, PZQ mode of action is different than OXA derivatives. We did an experiment with a  
282 susceptible strain and treated with 100 mg/kg PZQ. We obtain about 90% killing. Treated PZQ-  
283 resistant parasites (PZQ-R) with **830** [28], **610** and **303** results in 100% killing *in vitro* (Fig 8).  
284 These results encouraged the evaluation of PZQ and the best OXA derivatives in combination to  
285 treat PZQ-R infected mice. Combination therapy of PZQ + **303** resulted in 90.8% reduction in  
286 the PZQ-R worm burden ( $P= 0.0001$ , Fig 9) which strengthens our drug discovery outcomes  
287 since PZQ and **303** have a different mode of action. Schistosomes are dioecious multicellular  
288 eucaryotic parasites that do not multiply within the human body but reproduce sexually  
289 producing eggs which are responsible for pathogenesis and transmission. Drug resistance to PZQ  
290 and OXA are double recessive traits [31, 42]. The chance that an adult male and separately an  
291 adult female would develop resistance to both drugs is remote.

292  
293 We conclude that **830**, **790** and **303** are potential new drugs to treat *S. haematobium* and *S.*

294 *japonicum*. **303** is the potential drug that can be used with PZQ in combination for better  
295 treatment and to mitigate the development of resistance. The research now focuses on  
296 physicochemical, ADME, pharmacokinetics and toxicology studies that will justify requesting  
297 authorization from the Food and Drug Administration and ultimately clinical trials.

## 298 **Materials and Methods**

### 299 **Parasite Maintenance**

300 *Schistosoma mansoni*, *S. haematobium* and *S. japonicum* were maintained by passage through a  
301 snail intermediate host, *Biomphalaria glabrata*, *Bulinus truncatus* or *Oncomelania hupensis*,  
302 respectively. Golden Syrian Hamsters were the definitive host. Hamsters were infected with 250  
303 cercariae of *S. mansoni*, *S. haematobium*, or *S. japonicum*. to maintain the schistosome life cycle  
304 of each species according to IACUC protocol (Protocol #08039).

### 305 **Parasite Recovery**

306 Depending on *Schistosoma* species and the required stages for each experiment, the infected  
307 hamsters were sacrificed between 30 to 90 days post-infection (dpi) in accordance with IACUC  
308 protocol (UTHSCSA IACUC Protocol #08039). *S. japonicum* at 30 days, *S. mansoni* at 45 days  
309 and *S. haematobium* at 90 days. Animals were euthanized by intraperitoneal injection using  
310 Fatal-Plus (Butler Animal Health, Ohio), a sodium pentobarbital solution, and 10% heparin.  
311 Adult schistosomes were collected by perfusion as previously described (Duvall et al., 1967)  
312 using 0.9% saline containing EDTA.

### 313 **Parasite *In Vitro* Culture**

314 Harvested worms were cultured in 2ml 1X Dulbecco's Modified Eagle Medium (DMEM,  
315 Gibco) with 10% Heat Inactivated Fetal Bovine Serum (FBS, Atlantic Biologicals) and 1X

316 antibiotic/antimycotic (Ab/Am, GIBCO). Worms were manually sorted under a dissecting  
317 stereomicroscope and aliquoted to 10 single worms or paired worms per well in a 24-well plate.  
318 Three-hour schistosomula were mechanically transformed from cercariae according to Tucker et  
319 al. [43]. Worms were cultured in an incubator at 37°C and 5% CO<sub>2</sub> for 72 hours. Worm viability  
320 was assessed by daily observation. Culture media was changed every other day.

## 321 **OXA Derivative Design and Synthesis**

322 We employed an iterative process to develop new drugs [25]. To do this **830** was soaked into  
323 *SmSULT* crystals, the resulting SARs information was used by the Center for Innovative Drug  
324 Discovery (CIDD) to synthesize new derivatives that were tested for schistosomicidal activity in  
325 an *in vitro* killing assay [25, 27, 28]. The synthesis of the **830** chemical series was previously  
326 published [25].

## 327 **OXA Derivative *In Vitro* Assays**

328 OXA derivatives were solubilized in 100% Dimethyl sulfoxide (DMSO) then diluted to reach to  
329 the final concentrations 14.3 µM, 35.75 µM, 71.5 µM and 143 µM depending on the  
330 experiment's purposes. The derivatives were added directly to each well within 2-4 hours after  
331 collecting schistosomes from the hamsters. Each derivative was tested in triplicate. In addition to  
332 evaluate the derivatives efficacy at 143 µM and determine the minimum dose, we tested the  
333 ability of OXA derivatives to kill both genders and to kill Juvenile worms. Harvested worms  
334 from bisex infection were sorted to single female and male worms and female and male worms  
335 in worm pairs. To evaluate the ability of OXA derivatives to kill Juvenile stages male worms  
336 were collected in 20 dpi, 25 dpi, 28 dpi, 32 dpi, 45 dpi. Worms collected at 20 dpi were not  
337 sorted by sex. OXA was the positive control for only *S. mansoni* [18]. Drugs were incubated  
338 with schistosomes at 37°C, 5% CO<sub>2</sub> for 45 minutes, mimicking physiological conditions [22].

339 The worms were washed with plain media 3 times to remove any residual derivatives. Worms  
340 were then incubated in culture media for a period of up to 14 days. Worm motility, tegument  
341 shedding, opaque color, and tegument blebbing were used to evaluate survival and  
342 death/morbidity. Worms were observed daily up to 14 days. They were considered dead when  
343 they showed a lack of motility especially no response to being poked and were opaque. Culture  
344 media was changed every other day.

### 345 **OXA Derivative *In Vivo* Assays**

346

#### 347 **Evaluate the ability of OXA derivatives to kill the main three *Schistosoma*** 348 **species**

349 Five Balb/c mice per group were infected with 80 cercaria *S. mansoni* and maintained for 45 dpi,  
350 then treated by gavage with single oral dose of 100 mg/kg of OXA derivatives dissolved in 5%  
351 DMSO and 95% ethanol. Animals were perfused 10 days after treatment and the number of  
352 harvested worms counted. Control groups were treated with either diluent or OXA. To evaluate  
353 the ability of OXA derivatives to kill *S. haematobium* and *S. japonicum* in animal models 5  
354 hamsters per group were infected with 100 cercariae and maintained for 90 dpi and 30 dpi,  
355 respectively. Then animals were treated by gavage with single oral dose of 100 mg/kg of OXA  
356 derivative dissolved in 5% DMSO and 95% ethanol. The control groups were treated with  
357 diluent. Ten days after treatment, animals were perfused and collected worms were counted and  
358 compared to the control.

#### 359 **Evaluate 303 to kill immature, liver stage schistosomes**



360 Five Balb/c mice per group were infected with 100 cercaria of *S. mansoni*. Mice (n=5) were  
361 treated on days 20 dpi, 25 dpi, 28 dpi or 32 dpi with 100 mg/kg **303** and perfused on day 45 pi.  
362 The number of harvested worms from each treatment group were compared to untreated mice.  
363 **303** was dissolved in 5% DMSO and 95% Ethanol.

### 364 **Test combination treatment of PZQ and OXA derivatives ability to kill *S.*** 365 ***mansoni* PZQ-R**

366 To test PZQ in combination with OXA derivatives five Balb/c mice per group were infected with  
367 80 cercaria of *S. mansoni* PZQ-R. Mice were treated with 100 mg/kg by oral gavage with single  
368 oral dose of PZQ, **610**, **303**. For combination treatment groups mice were treated with single  
369 oral dose of PZQ + **610** and PZQ + **303** with 100 mg/kg of each drug. Drugs were dissolved in  
370 5% DMSO and 95% ethanol. The animals were treated at 45 dpi and *S. mansoni* PZQ-R worms  
371 were harvested at day 55 post infection. The control groups were treated with diluent.

### 372 **RNA Extraction**

373 Total RNA was obtained from frozen samples of adult *S. mansoni* worms. All frozen samples  
374 were thawed on ice in RNAzolRT (Molecular Research Center Inc.) each sample then was  
375 placed in 2 ml tubes of Lysin Matrix Tubes containing 1.4 mm ceramic spheres and then  
376 homogenized 2x using Beadbeater homogenizer (Biospec, USA) for 45 seconds. RNA was  
377 extracted and purified according to (Molecular Research Center Inc.) manufacturer instructions  
378 for total RNA isolation.

### 379 **cDNA Synthesis**

380 cDNA was generated from total RNA using BioRad iSCRIPT cDNA Synthesis Kit according to  
381 the manufacturer's instructions.

## 382 **dsRNA Synthesis and Treatment**

383 Forward 5'-ATT GGA TGG TTA CAT AGC AAC TAC -3' and reverse 5'-CCA TGG ATC  
384 ATT TGA TTT GGG T -3' primers amplifying a 192-592 bp section of the coding region for  
385 *SmSULT* (Smp\_ 089320) were designed using PrimerDesign tool by IDTdna. Polymerase chain  
386 reaction (PCR) was performed to produce an amplicon, followed by confirmation of  
387 amplification by running the PCR product on a 1% agarose gel.

388 T7 promoters were added to the forward and reverse primer to flank the PCR product.  
389 Confirmation of amplification was also performed via 1% agarose gel. The PCR product with T7  
390 promoters were used as a template for transcription of the dsRNA. The dsRNA was placed in a  
391 37°C water bath within 24 hours and treated with DNAase to remove contaminants. Ammonium  
392 acetate 3 M was added, followed by 100% ethanol to precipitate the RNA. The RNA was left at  
393 this step overnight. Then the sample was centrifuged at 14000 rpm, forming an RNA pellet. The  
394 pellet was washed twice with 70% ethanol. On the second wash, the supernatant was removed,  
395 and the ethanol allowed to evaporate. Then the pellet was resuspended in nuclease-free water.  
396 The concentration of RNA was then measured using the Thermo Scientific NanoDroprop 1000  
397 spectrophotometer.

398 Ten adult male schistosomes were collected, sorted, and treated at 45 dpi with 30 µg/mL dsRNA  
399 in triplicate of *S. mansoni* SULT or irrelevant control *Luciferase* (M15077) right after worm  
400 sorting. Then worms were treated again after 3, 7, and 11 days. OXA derivatives (143 µM) were  
401 added at day 6. The worms were observed for 14 days. Observation included notes on worm  
402 health, viability; lack of motility, shedding of tegument, blebbing of tegument, internal  
403 vacuolization, lethargy, and being opaque [38].

## 404 **Crystallization, Structure Determination, and Refinement of CIDD-** 405 **0150610 and CIDD-0150303 Complexed with SULT**

406 Automated screening for crystallization was carried out using the sitting drop vapor-diffusion  
407 method with an Art Robbins Instruments Phoenix system in the Structural Biology Core at the  
408 University of Texas Health Science Center at San Antonio. *SmSULT* was prepared as previously  
409 described [22]. CIDD compounds were added first to apo *SmSULT* and incubated for 30 min  
410 prior to adding PAP. The protein complexes were mixed in a 1:1 ratio with crystal screen  
411 reagents for a total drop volume of 0.4 mL. *SmSULT*:CIDD-0150303 crystals were grown at  
412 22°C in Molecular Dimensions Morpheus condition 1-1 (30% Precipitant Mix 1 [30% PEG 500  
413 MME; 20% PEG 20000], 0.06 M Divalents Mix [0.3 M magnesium chloride hexahydrate, 0.3 M  
414 calcium chloride dihydrate], 0.1 M Buffer System 1 pH 6.5 [1.0 M imidazole:MES]).  
415 *SmSULT*:CIDD-0150610 crystals were grown at 4°C in Anatrace MCSG-3 condition A1 (20%  
416 PEG 8000, 0.1 M HEPES:NaOH pH 7.5). Crystals were flash-cooled in liquid nitrogen by  
417 wicking off excess solution from crystals harvested in nylon cryo-loops prior to data collection at  
418 the Advanced Photon Source, Argonne, IL, NE-CAT beamline 24-ID-E. Diffraction data were  
419 processed using AUTOPROC [44]. The structures were determined by the molecular  
420 replacement method implemented in PHASER[45] using coordinates from PDB entry 6BDR  
421 [27] as the search model. Coordinates were refined using PHENIX [46] including simulated  
422 annealing and alternated with manual rebuilding using COOT [47]. All models were verified  
423 using composite omit map analysis [48]. Data collection and refinement statistics are shown in  
424 Table S2. PyMOL was used to generate images for the crystal structures (The PyMOL Molecular  
425 Graphics System, Version 2.2 Schrödinger, LLC.).

426

## 427 **Statistical Analysis**

428 Statistical analysis for the Kaplan-Meier curves were performed using GraphPad Prism software  
429 (version 9.3.1). Differences in the survival function of different treatments were tested using a  
430 Curve Comparison/ Long-rank (Mantel-cox) test. Unpaired t test was used for treatment  
431 comparisons in animal models.

432

## 433 **Acknowledgments**

434 *Oncomelania hupensis* exposed to *S. japonicum* were provided by the Schistosomiasis Resource  
435 Center of the Biomedical Research Institute (Rockville, MD) through NIH-NIAID Contract  
436 HHSN272201700014I:. We thank the Structural Biology Core Facilities, a part of the  
437 Institutional Research Cores at the UT Health at San Antonio and Advanced Photon Source, a  
438 U.S. Department of Energy (DOE) Office of Science User Facility operated for the DOE Office  
439 of Science by Argonne National Laboratory for using their resources. We also acknowledge  
440 Ovidiu Dumitru Orbai for assistance with experimental procedures.

## 441 **References**

- 442 1. Gryseels, B., et al., *Human schistosomiasis*. Lancet, 2006. **368**(9541): p. 1106-18.
- 443 2. Steinmann, P., et al., *Schistosomiasis and water resources development: systematic*  
444 *review, meta-analysis, and estimates of people at risk*. Lancet Infect Dis, 2006. **6**(7): p.  
445 411-25.
- 446 3. WHO, *Fact Sheet: Schistosomiasis* Available from:  
447 <http://www.who.int/mediacentre/factsheets/fs115/en>. 2016.
- 448 4. Committee, W.E., *Prevention and control of schistosomiasis and soil-transmitted*  
449 *helminthiasis*. World Health Organ Tech Rep Ser, 2002. **912:i-vi, 1-57, back cover**.
- 450 5. van der Werf, M.J., de Vlas, S.J., Brooker, S., Looman, C.W., Nagelkerke, N.J.,  
451 Habbema, J.D., Engels, D., *Quantification of clinical morbidity associated with*  
452 *schistosome infection in sub-Saharan Africa*. Acta Trop, 2003. **86**: p. 125-139.
- 453 6. Chitsulo, L., LoVerde, P. & Engels, D., *Focus: Schistosomiasis*. Nat. Rev. Microbiol. ,  
454 2004. **2**(12).

- 455 7. GBD 2016 DALYs and HALE Collaborators, *Global, regional, and national disability-*  
456 *adjusted life-years (DALYs) for 333 diseases and injuries and healthy life expectancy*  
457 *(HALE) for 195 countries and territories, 1990-2016: a systematic analysis for the*  
458 *Global Burden of Disease Study 2016*. *Lancet* 390, 2017: p. 1260–1344.
- 459 8. Chen MG, M.K., *Progress in assesment of morbidity due to Schistosoma mansoni*  
460 *infection: a review of recent literature*. *Trop Dis Bull* 1998. **85**: p. R1-56.
- 461 9. Homeida, M., et al., *Morbidity associated with Schistosoma mansoni infection as*  
462 *determined by ultrasound: a study in Gezira, Sudan*. *Am J Trop Med Hyg*, 1988. **39**(2):  
463 p. 196-201.
- 464 10. B, G., *The relevance of schistosomiasis for public health*. *Trop Med Parasitol* 1989. **40**: p.  
465 134-42.
- 466 11. Verjee, M.A., *Schistosomiasis: Still a Cause of Significant Morbidity and Mortality*. *Res*  
467 *Rep Trop Med*, 2019. **10**: p. 153-163.
- 468 12. Doenhoff, M.J.H., P., Cioli, D., Southgate, V., Pica-Mattoccia, L., Botros, S., Coles, G.,  
469 Tchuem Tchuente, L. A., Mbaye, A., Engels, D., *Praziquantel: its use in control of*  
470 *schistosomiasis in sub-Saharan Africa and current research needs*. *Parasitology*, 2009.  
471 **136**(13): p. 1825-35.
- 472 13. Fallon, P.G. and M.J. Doenhoff, *Drug-resistant schistosomiasis: resistance to*  
473 *praziquantel and oxamniquine induced in Schistosoma mansoni in mice is drug specific*.  
474 *Am J Trop Med Hyg*, 1994. **51**(1): p. 83-8.
- 475 14. Gryseels, B., et al., *Epidemiology, immunology and chemotherapy of Schistosoma*  
476 *mansoni infections in a recently exposed community in Senegal*. *Trop Geogr Med*, 1994.  
477 **46**(4 Spec No): p. 209-19.
- 478 15. Ismail, M., et al., *Resistance to praziquantel: direct evidence from Schistosoma mansoni*  
479 *isolated from Egyptian villagers*. *Am J Trop Med Hyg*, 1999. **60**(6): p. 932-5.
- 480 16. Alonso, D., et al., *Failure of standard treatment with praziquantel in two returned*  
481 *travelers with Schistosoma haematobium infection*. *Am J Trop Med Hyg*, 2006. **74**(2): p.  
482 342-4.
- 483 17. Couto, F.F., et al., *Schistosoma mansoni: a method for inducing resistance to*  
484 *praziquantel using infected Biomphalaria glabrata snails*. *Mem Inst Oswaldo Cruz*,  
485 2011. **106**(2): p. 153-7.
- 486 18. Cioli, D., L. Pica-Mattoccia, and S. Archer, *Antischistosomal drugs: past, present ... and*  
487 *future?* *Pharmacol Ther*, 1995. **68**(1): p. 35-85.
- 488 19. Katz, N. and P.M. Coelho, *Clinical therapy of schistosomiasis mansoni: the Brazilian*  
489 *contribution*. *Acta Trop*, 2008. **108**(2-3): p. 72-8.
- 490 20. Rogers, S.H. and E. Bueding, *Hycanthon resistance: development in Schistosoma*  
491 *mansoni*. *Science*, 1971. **172**(3987): p. 1057-8.
- 492 21. Pica-Mattoccia, L., Dias, L.C., Moroni, R., Cioli, D., *Schistosoma mansoni: genetic*  
493 *complementation analysis shows that two independent hycanthon/oxamniquine-resistant*  
494 *strains are mutated in the same gene*. *Exp. Parasitol*, 1993. **77**: p. 445-9.
- 495 22. Valentim, C.L., et al., *Genetic and molecular basis of drug resistance and species-*  
496 *specific drug action in schistosome parasites*. *Science*, 2013. **342**(6164): p. 1385-9.
- 497 23. Chevalier, F.D., et al., *Oxamniquine resistance alleles are widespread in Old World*  
498 *Schistosoma mansoni and predate drug deployment*. *PLoS Pathog*, 2019. **15**(10): p.  
499 e1007881.

- 500 24. Taylor, A.B., et al., *Structural and enzymatic insights into species-specific resistance to*  
501 *schistosome parasite drug therapy*. J Biol Chem, 2017. **292**(27): p. 11154-11164.
- 502 25. LoVerde, P.T., et al., *Rational approach to drug discovery for human schistosomiasis*. Int  
503 J Parasitol Drugs Drug Resist, 2021. **16**: p. 140-147.
- 504 26. Rugel, A.R., et al., *Why does oxamniquine kill Schistosoma mansoni and not S.*  
505 *haematobium and S. japonicum?* Int J Parasitol Drugs Drug Resist, 2020. **13**: p. 8-15.
- 506 27. Rugel, A., et al., *Design, Synthesis, and Characterization of Novel Small Molecules as*  
507 *Broad Range Antischistosomal Agents*. ACS Med Chem Lett, 2018. **9**(10): p. 967-973.
- 508 28. Guzman, M.A., et al., *An iterative process produces oxamniquine derivatives that kill the*  
509 *major species of schistosomes infecting humans*. PLoS Negl Trop Dis, 2020. **14**(8): p.  
510 e0008517.
- 511 29. Foster, R., *A review of clinical experience with oxamniquine*. Trans R Soc Trop Med  
512 Hyg, 1987. **81**(1): p. 55-9.
- 513 30. Guzman, M., et al., *Molecular basis for hycanthone drug action in schistosome parasites*.  
514 Mol Biochem Parasitol, 2020. **236**: p. 111257.
- 515 31. Winka Le Clec'h, F.D.C., Ana Carolina A. Mattos, Amanda Strickland, et al., *Genetic*  
516 *analysis of praziquantel resistance in schistosome parasites implicates a Transient*  
517 *Receptor Potential channel*. Science Translational Medicine, 2021. **13**(625).
- 518 32. Park, S.K., et al., *Mechanism of praziquantel action at a parasitic flatworm ion channel*.  
519 Sci Transl Med, 2021. **13**(625): p. eabj5832.
- 520 33. LoVerde, P.T., *Schistosomiasis*. Adv Exp Med Biol. , 2019. **1154**: p. 45-70.
- 521 34. Sabah, A.A., et al., *Schistosoma mansoni: chemotherapy of infections of different ages*.  
522 Exp Parasitol, 1986. **61**(3): p. 294-303.
- 523 35. Utzinger, J., et al., *Combination chemotherapy of schistosomiasis in laboratory studies*  
524 *and clinical trials*. Antimicrob Agents Chemother, 2003. **47**(5): p. 1487-95.
- 525 36. Lu, Z., et al., *A gene expression atlas of adult Schistosoma mansoni and their gonads*. Sci  
526 Data, 2017. **4**: p. 170118.
- 527 37. Wendt, G.R., M.L. Reese, and J.J. Collins, 3rd, *SchistoCyte Atlas: A Single-Cell*  
528 *Transcriptome Resource for Adult Schistosomes*. Trends Parasitol, 2021. **37**(7): p. 585-  
529 587.
- 530 38. Guzman, M.A., et al., *Schistosome Sulfotransferases: Mode of Action, Expression and*  
531 *Localization*. Pharmaceuticals, 2022. **14**(7).
- 532 39. Danso-Appiah, A. and S.J. De Vlas, *Interpreting low praziquantel cure rates of*  
533 *Schistosoma mansoni infections in Senegal*. Trends Parasitol, 2002. **18**(3): p. 125-9.
- 534 40. Taylor, A.B., et al., *Structural and Functional Characterization of the Enantiomers of the*  
535 *Antischistosomal Drug Oxamniquine*. PLoS Negl Trop Dis, 2015. **9**(10): p. e0004132.
- 536 41. Park, S.K. and J.S. Marchant, *The Journey to Discovering a Flatworm Target of*  
537 *Praziquantel: A Long TRP*. Trends Parasitol, 2020. **36**(2): p. 182-194.
- 538 42. Cioli, D., L. Pica-Mattoccia, and R. Moroni, *Schistosoma mansoni:*  
539 *hycanthone/oxamniquine resistance is controlled by a single autosomal recessive gene*.  
540 Exp Parasitol, 1992. **75**(4): p. 425-32.
- 541 43. Tucker, M.S., et al., *Schistosomiasis*. Curr Protoc Immunol, 2013. **103**: p. 19 1 1-19 1 58.
- 542 44. Vonrhein, C., et al., *Data processing and analysis with the autoPROC toolbox*. Acta  
543 Crystallogr D Biol Crystallogr, 2011. **67**(Pt 4): p. 293-302.
- 544 45. McCoy, A.J., et al., *Phaser crystallographic software*. J Appl Crystallogr, 2007. **40**(Pt 4):  
545 p. 658-674.

- 546 46. Adams, P.D., et al., *PHENIX: a comprehensive Python-based system for macromolecular*  
547 *structure solution*. Acta Crystallogr D Biol Crystallogr, 2010. **66**(Pt 2): p. 213-21.  
548 47. Cowtan, P.E.a.K., *Coot: Model-Building Tools for Molecular Graphics*. Acta Cryst,  
549 2004. **D60**: p. 2126-32.  
550 48. Terwilliger, T.C., et al., *Iterative-build OMIT maps: map improvement by iterative model*  
551 *building and refinement without model bias*. Acta Crystallogr D Biol Crystallogr, 2008.  
552 **64**(Pt 5): p. 515-24.  
553

## 554 **Funding**

555 San Antonio Biomedical Education and Research Program. Institutional Research and  
556 Academic Career Development Award from the National Institute of General Medical  
557 Science 2k12GM111726 Postdoctoral support for SA.  
558 National Institute of Allergy and Infectious Diseases AI27219 to PTL.  
559 Morrison Trust to PTL.  
560 Institutional Research Cores at the University of Texas Health Science Center at San  
561 Antonio supported by the Office of the Vice President for Research, Greehey\': Children's  
562 Cancer Research Institute and Mays Cancer Center Drug Discovery and Structural  
563 Biology Shared Resource National Institutes of Health grant P30 CA054174 to ABT.  
564 The Rigaku HyPix-6000HE Detector, Universal Goniometer and VariMax-VHF Optic  
565 instrumentation in the Structural Biology Core Facilities are funded by NIH-ORIP SIG  
566 Grant S10OD030374 to ABT.  
567 National Institute of General Medical Sciences from the National Institutes of Health  
568 (P30 GM124165) to ABT.  
569 The Eiger 16M detector on the 24-ID-E beam line is funded by a NIH-ORIP HEI grant  
570 (S10OD021527) to ABT.

## 571 **Competing Interests**

572 Authors declare that they have no competing interests.

573  
574

## 575 **Supporting Information**

576 **S1 Fig. Ability of OXA And OXA Derivatives to Kill *Schistosoma* Species at Final**

577 **Concentrations of 143  $\mu$ m, 71.5  $\mu$ m, 35.75  $\mu$ m, And 14.3  $\mu$ m Per Well *In Vitro*. A. OXA**

578 **against *S. mansoni*. B.1. CIDD-0149830 against *S. mansoni*, B.2. CIDD-0149830 against *S.***

579 ***haematobium*. B.3. CIDD-0149830 against *S. japonicum*. C.1. CIDD-0150610 against *S.***

580 ***mansoni*, C.2. CIDD-0150610 against *S. haematobium* and C.3. CIDD-0150610 against *S.***

581 ***japonicum*. D.1. CIDD-0150303 against *S. mansoni*, D.2. CIDD-0150303 against *S.***

582 ***haematobium*, and D.3. CIDD-0150303 against *S. japonicum*. E. The percentage of worms killed**

583 **at each concentration. OXA and OXA derivatives were tested against adult male worms. All**

584 **drugs were solubilized in 100% DMSO. All screens were performed in experimental and**

585 **biological triplicate. Survival was plotted as a percentage over time using Prism/Curve**

586 **Comparison/ Long-rank (Mantel-cox) test. The p-value threshold for each derivative compared**

587 **to DMSO was <0.001**

588 **S2 Fig. Kaplan-Meier Curves Demonstrate the Knockdown of *S. mansoni* Sulfotransferase**

589 **Confers Resistance Upon Challenge. A.1. CIDD-0149830: *SmSULT* RNAi alone, Irrelevant**

590 **RNAi, *SmSULT* RNAi + OXA, and *SmSULT* RNAi + 830 had 93%+ survival and were displaying**

591 **healthy characteristics. All other groups expressed similar, expected sensitivity levels to 830 treatments**

592 **A.2. CIDD-0150610: *SmSULT* RNAi alone, Irrelevant RNAi, and *SmSULT* RNAi + 610 had 90%+**

593 **survival and were displaying healthy characteristics. All other groups expressed similar, expected**

594 **sensitivity levels to 610 treatments A.3. CIDD-0150303: *SmSULT* RNAi alone, Irrelevant RNAi, and**

595 ***SmSULT* RNAi + 303 had 93%+ survival and were displaying healthy characteristics. All other groups**



596 expressed similar, expected sensitivity levels to **303** treatments.

597  
598 **S1 Table. Chemical Structure Of CIDD-066790, CIDD-0149830, CIDD-0150610, and**  
599 **CIDD-0150303.**

600 **S2 Table. Crystallographic Data Collection and Refinement Statistics.**

601 **S3 Table. OXA Derivatives Against Schistosoma Species *In Vitro* Results**

602

603

604 **S4 Table. Test The Efficacy of OXA Derivates in An *in Vivo* Model.**

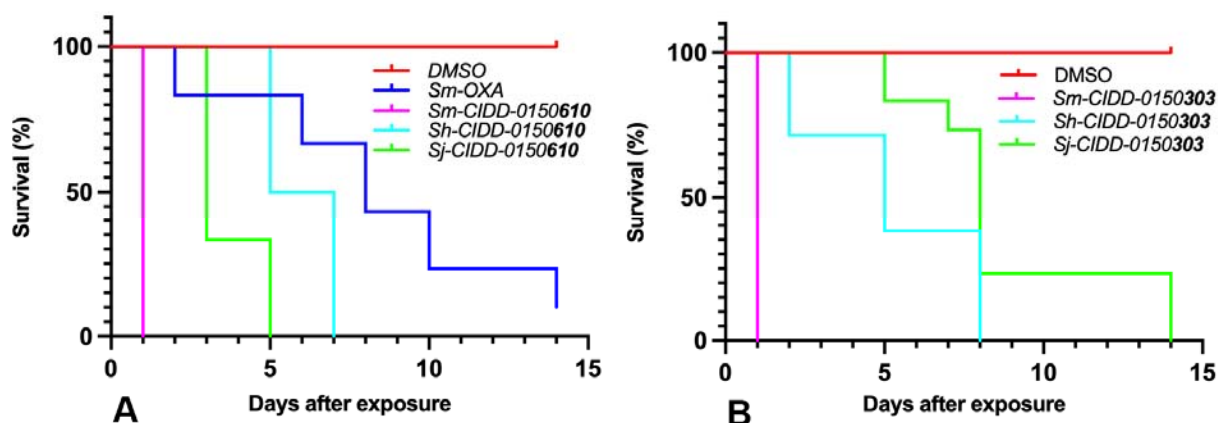

**Fig 1: Kaplan-Meier Curves Demonstrate the Ability of OXA Derivatives to Kill Adult Schistosomes *In Vitro*.** A. CIDD-0150610, B. CIDD-0150303. Both compounds kill 100% of *S. mansoni*, *S. haematobium* and *S. japonicum* compared to OXA that kills 90% of *S. mansoni in vitro*. OXA derivatives were tested against 10 adult male worms per well. All derivatives were solubilized in 100% DMSO, administered at a final concentration of 143  $\mu$ M per well for 45 minutes, washed 3 times with media. 45-minute exposure mimics the exposure time in a human (D. Cioli, pers commun.). All screens were performed in experimental and biological triplicate. Survival was plotted as a percentage over time using Prism/Curve Comparison/ Long-rank (Mantel-cox) test. The p-value threshold for each derivative compared to DMSO was <0.001.

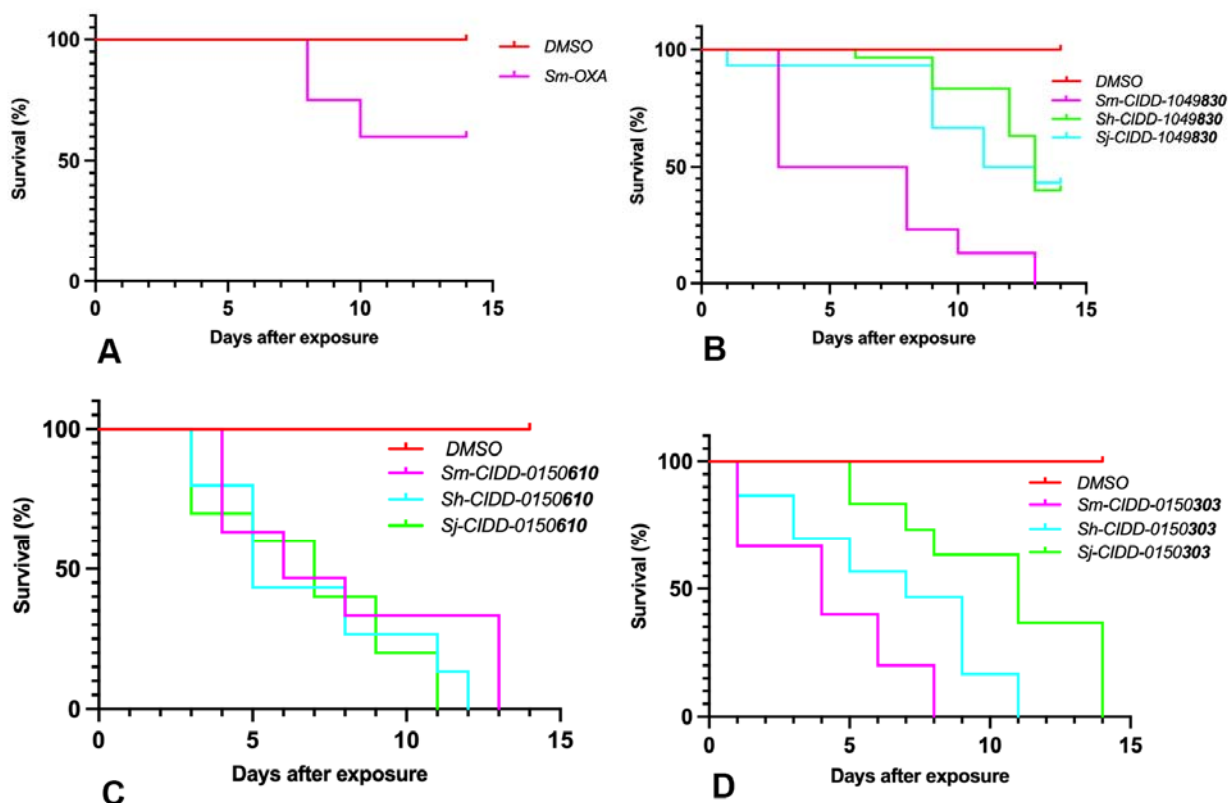

**Fig 2: Kaplan-Meier Curves Demonstrate the Effect of Final Concentration Of 71.5  $\mu\text{m}$  Per Well.** A. OXA, B. CIDD-0149830, C. CIDD-0150610, and D. CIDD-0150303. **610** and **303** will kill 100% of *S. mansoni*, *S. haematobium* and *S. japonicum*. **830** will kill 100% of *S. mansoni*, 60% of *S. haematobium* and 56.7% of *S. japonicum*. OXA will kill 40% of *S. mansoni* OXA and OXA derivatives were tested against 10 adult male worms per well. All derivatives were solubilized in 100% DMSO. The worms were treated for 45 minutes, washed 3 times with media. 45-minute exposure mimics the exposure time in a human All screens were performed in experimental and biological triplicate. Survival was plotted as a percentage over time using Prism/ Curve Comparison/ Long-rank (Mantel-cox) test. The p-value threshold for each

derivative compared to DMSO was  $<0.001$ .

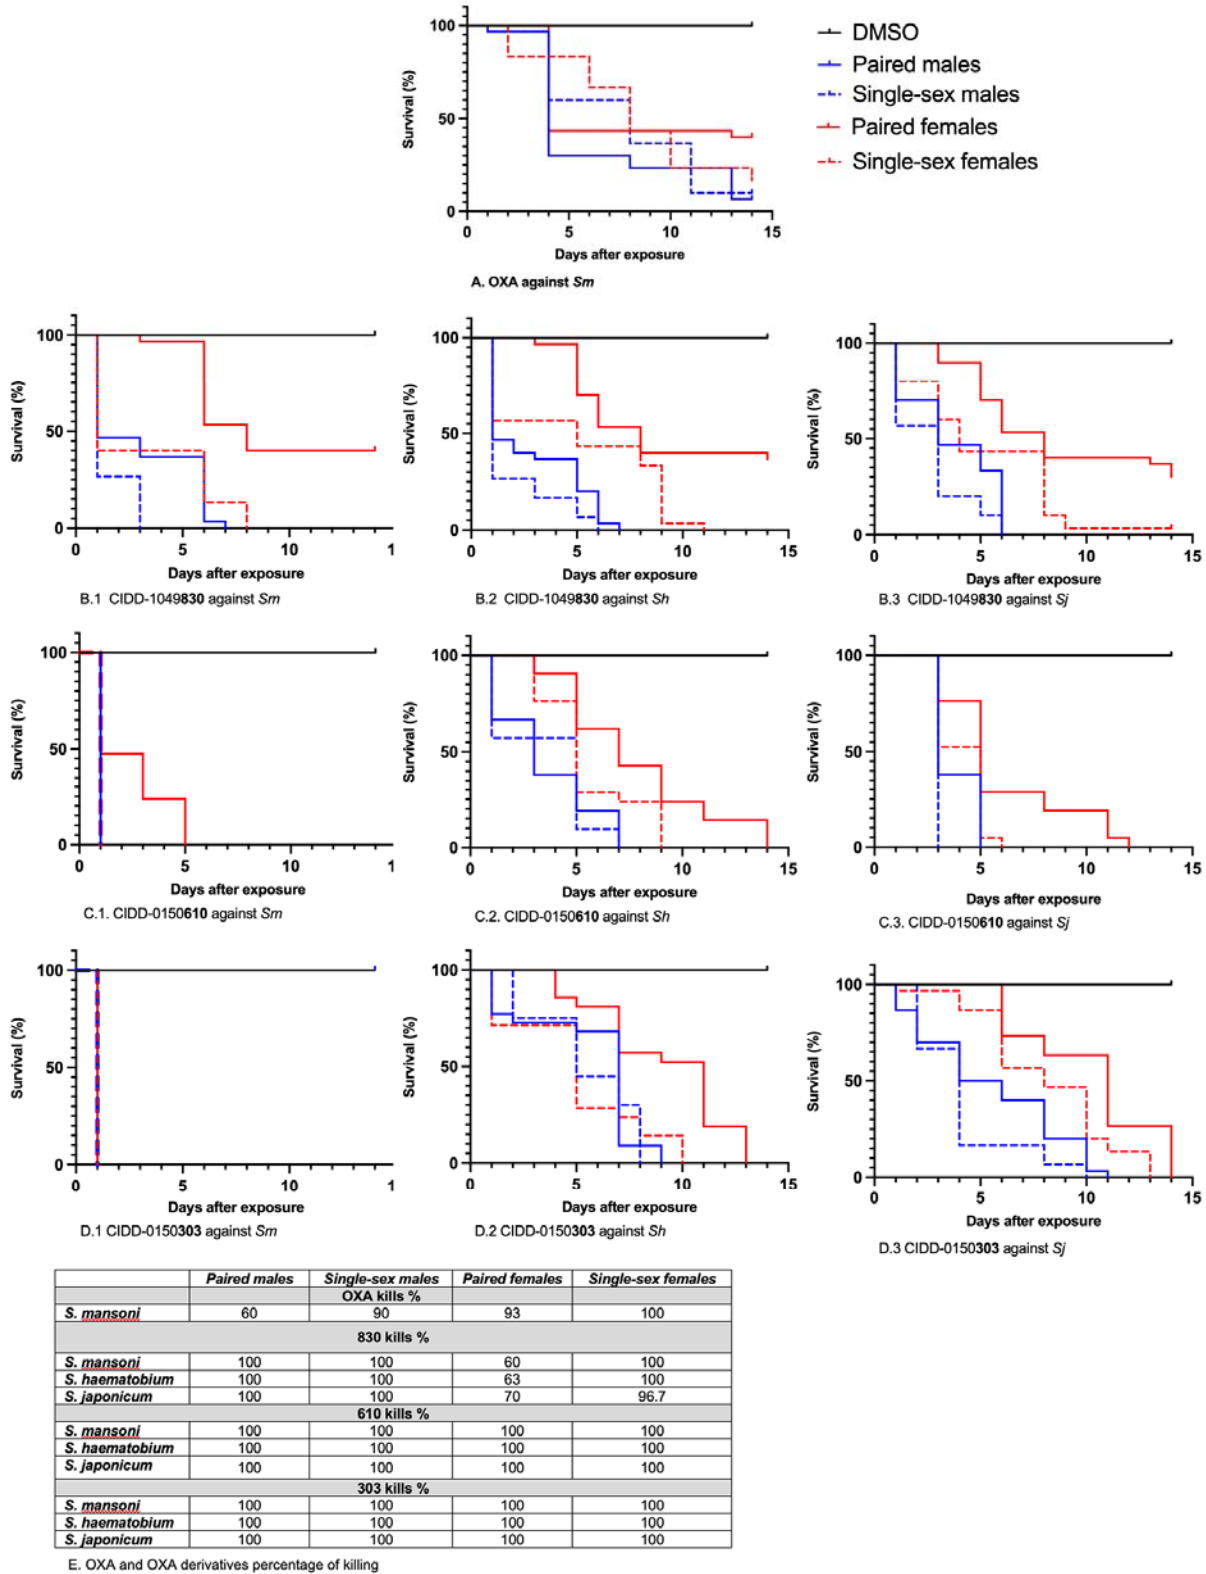

**Fig 3: Kaplan-Meier Curves Demonstrate the Ability of OXA And OXA Derivatives to Kill**

**Both Genders.** A. OXA to kill both genders of *S. mansoni* B. CIDD-0149**830** against both genders of B.1. *S. mansoni*, B.2. *S. haematobium*, and B.3. *S. japonicum*. C. CIDD-0150**610** against both genders of C.1. *S. mansoni*, C.2. *S. haematobium*, and C.3. *S. japonicum*. D. CIDD-0150**303** against both genders of D.1. *S. mansoni*, D.2. *S. haematobium*, and D.3. *S. japonicum*. E. Percentages of worm killing. OXA and OXA derivatives were tested against 10 adults of single sex- female and male worms and female and male worms in worm pairs per well. **610** and **303** kill 100% of both gender from *S. mansoni*, *S. haematobium* and *S. japonicum*. **830** kills 100% of paired males, and single-sex females and 96.7% of single-sex females. Paired females were less susceptible to **830**. OXA demonstrates the expected level of killing against single-sex males and paired females from *S. mansoni*, the drug is effective 100% against single-sex females and less effective 60% against paired males. All derivatives were solubilized in 100% DMSO and administered at a final concentration of 143  $\mu$ M per well for 45 minutes, washed 3 times with media. 45-minute exposure mimics the exposure time in a human. All screens were performed in experimental and biological triplicate. Survival was plotted as a percentage over time using Prism/Curve Comparison/ Long-rank (Mantel-cox) test. The p-value threshold for each derivative compared to DMSO was <0.00.

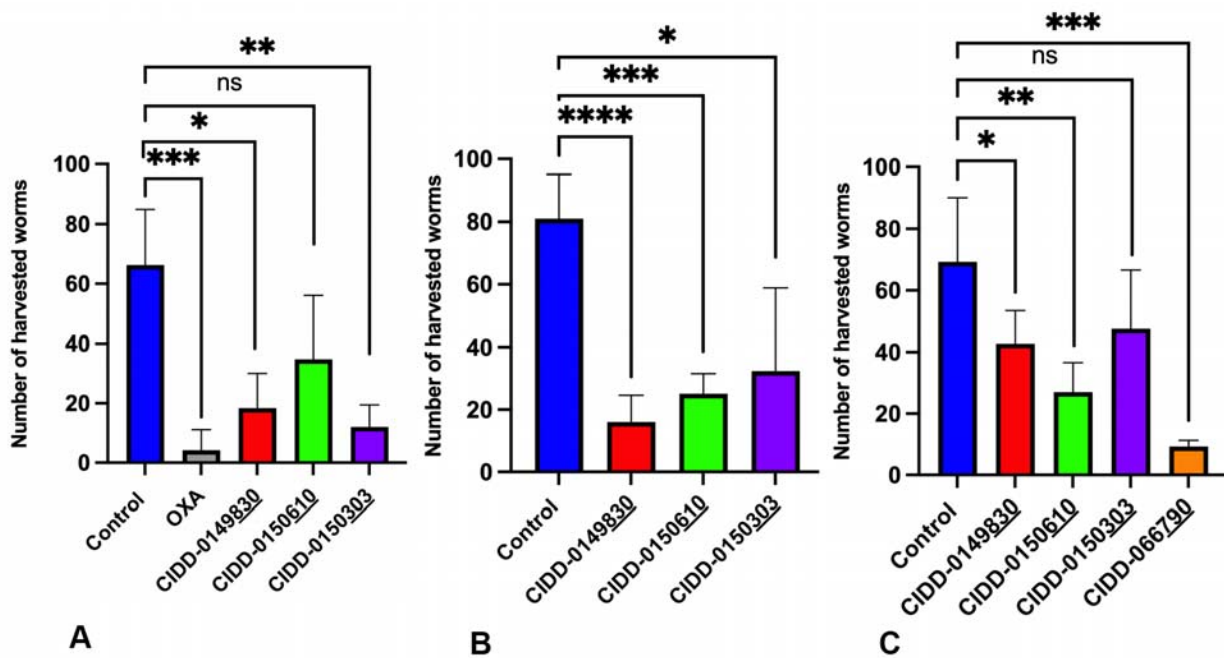

**Fig 4: Effect of OXA Derivatives on A. *S. mansoni* B. *S. haematobium* C. *S. japonicum* Infected Animals.** Five mice per group were infected with *S. mansoni*, 5 hamsters per group were infected with *S. haematobium*, and 5 hamsters per group were infected with *S. japonicum*. Worms were collected 10 days after treatment with a single dose of 100 mg/kg by oral gavage compared to the untreated control group. Prism/unpaired t test ( $P < 0.05$ ).

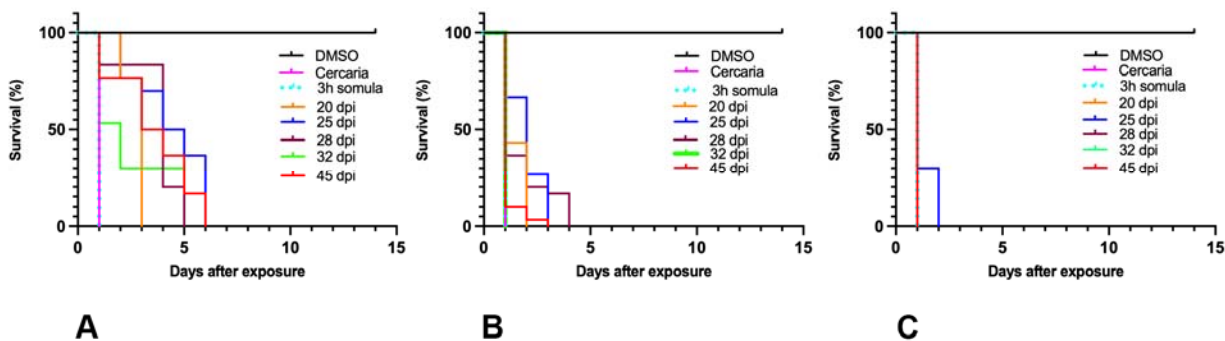

**Fig 5: Kaplan-Meier Curves Demonstrate the Ability of OXA Derivatives to Kill All Life Stages of *S. mansoni*.** A. CIDD-0149830, B. CIDD-0150610, and C. CIDD-0150303 OXA derivatives were tested against cercaria, 3-hour schistosomula, and male worms for 20 dpi, 25 dpi, 28 dpi, 32 dpi and 45 dpi. OXA derivatives demonstrate 100% of killing for all life stages within 2-6 days. All derivatives were solubilized in 100% DMSO and administered at a final concentration of 143  $\mu$ M per well for 45 minutes, washed 3 times with media. 45-minute exposure mimics the exposure time in a human. Each well contained 10 male adult worms. All screens were performed in experimental and biological triplicate. Survival was plotted as a percentage over time using Prism/Curve Comparison/ Long-rank (Mantel-cox) test. The p-value threshold for each derivative compared to DMSO was <0.001.



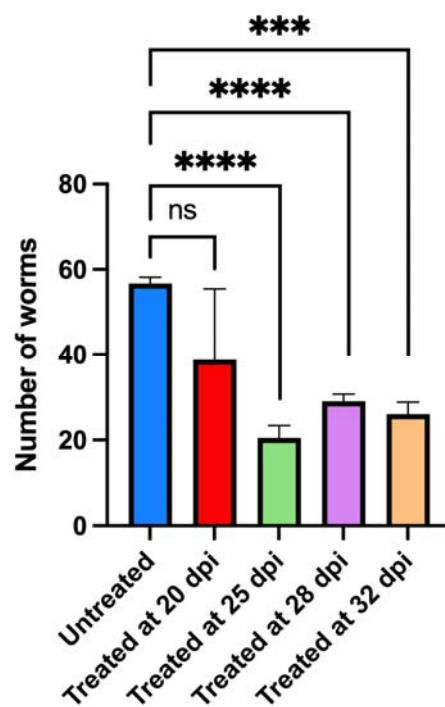

**Fig 6: OXA Derivatives Significantly Reduced the Number of Collected *S. mansoni* Juvenile Worms from Infected Mice.** Five mice per group were infected with 100 cercaria of *S. mansoni*. Mice were treated with a single dose of 100 mg/kg by oral gavage of CIDD-0150303 at the day specified on the X-axis and worm burden determined on day 45 pi. Prism/unpaired t test ( $P < 0.05$ ).

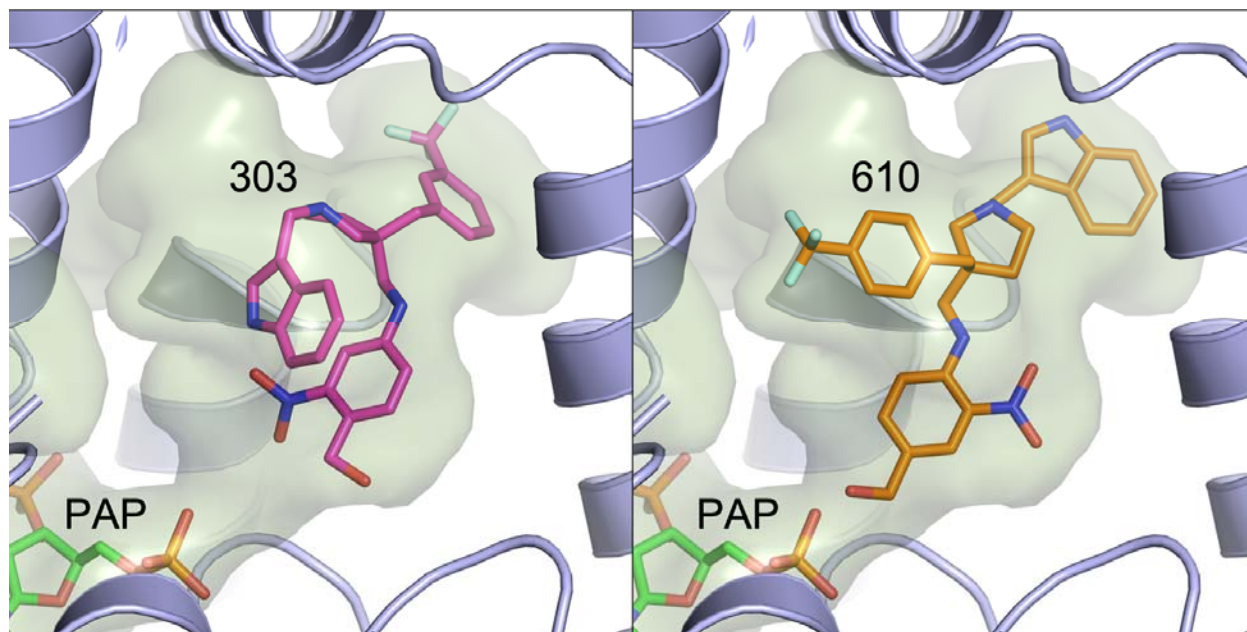

**Fig 7: Crystal Structures of CIDD-0150303 (Left Panel) And CIDD-0150610 (Right Panel) Shown in The Active Site of *SmSULT*.** The active site inner surface cavity is depicted in light green. Secondary structure elements in front of the compounds were omitted for clarity. The branched indole and (trifluoromethyl) phenyl groups at top are observed in swapped positions between the two compounds.

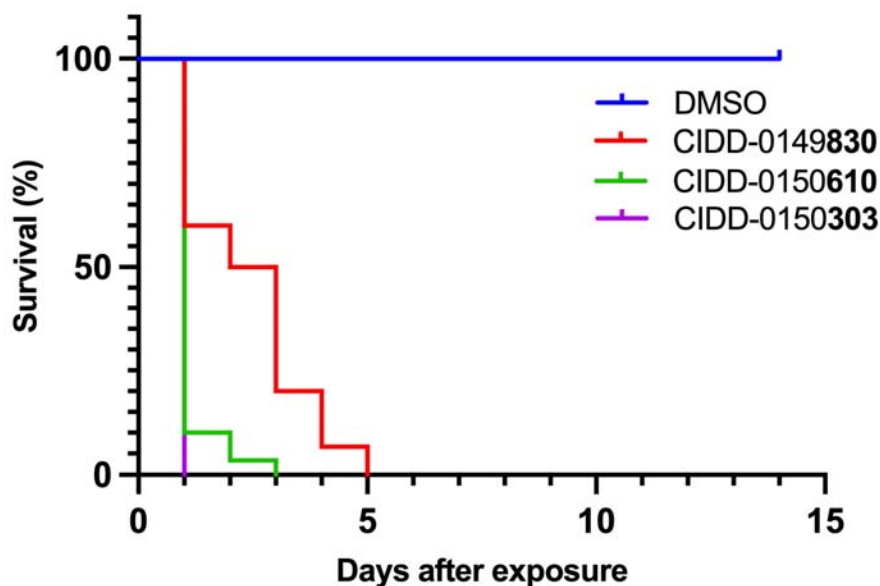

**Fig 8: Kaplan-Meier Curves Demonstrate the Ability of CIDD-0149830, CIDD-0150610, and CIDD-0150303 to Kill *S. mansoni* PZQ-R.** All derivatives were solubilized in 100% DMSO and administered at a final concentration of 143  $\mu$ M per well for 45 minutes, washed 3 times with media. 45-minute exposure mimics the exposure time in a human. Each well contained 10 male adult worms. All screens were performed in experimental and biological triplicate. Survival was plotted as a percentage over time using Prism/Curve Comparison/ Long-rank (Mantel-cox) test. The p-value threshold for each derivative compared to DMSO was <0.001.

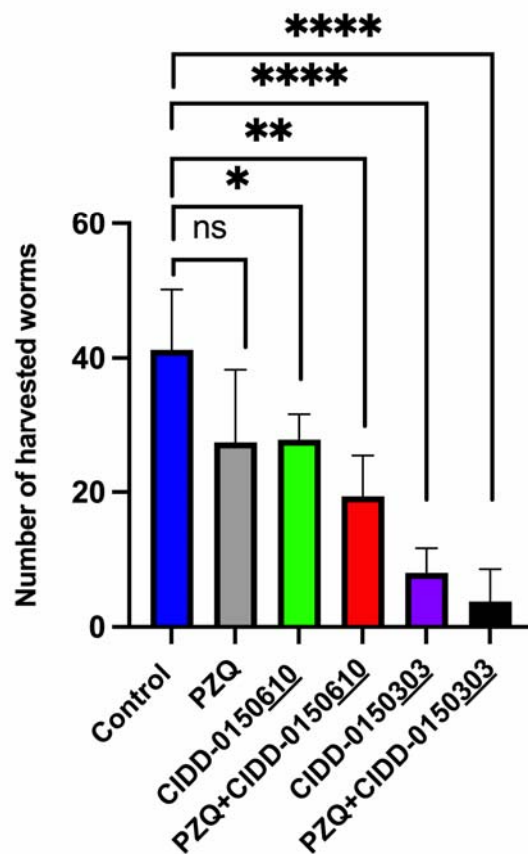

**Fig 9: Combination Therapy of PZQ-R Infected Mice.** Five mice per group were infected with *S. mansoni* PZQ-R. Worms were collected 10 after days of treatment with a single dose of 100 µg/g by oral gavage and compared to the control group. Prism/unpaired t test ( $P < 0.05$ ).
